# Supplementary material for: Building smart TiO2 nanorod networks in/on the film of P25 nanoparticles for high-efficiency dye sensitized solar cells
Source: Royal Society of Chemistry journal article supplement (doi:10.1039/c3ra47869f), 2014-01-01
Supplement: c3ra47869f1.pdf [file c3ra47869f1.pdf]

Supporting Information

# Building smart TiO<sub>2</sub> nanorod networks in/on the film of P25 nanoparticles for high-efficiency dye sensitized solar cells

*Yamin Feng, Jianhui Zhu, Jian Jiang, Wenwu Wang, Gaoxiang Meng, Fei Wu, Yongli Gao, Xintang Huang \**

*Institute of Nanoscience and Nanotechnology, Department of Physics, Central China Normal University, 430079, Wuhan, P. R. China.*

*\*Corresponding author: Department of Physics, Central China Normal University, 430079, Wuhan, P. R. China.*

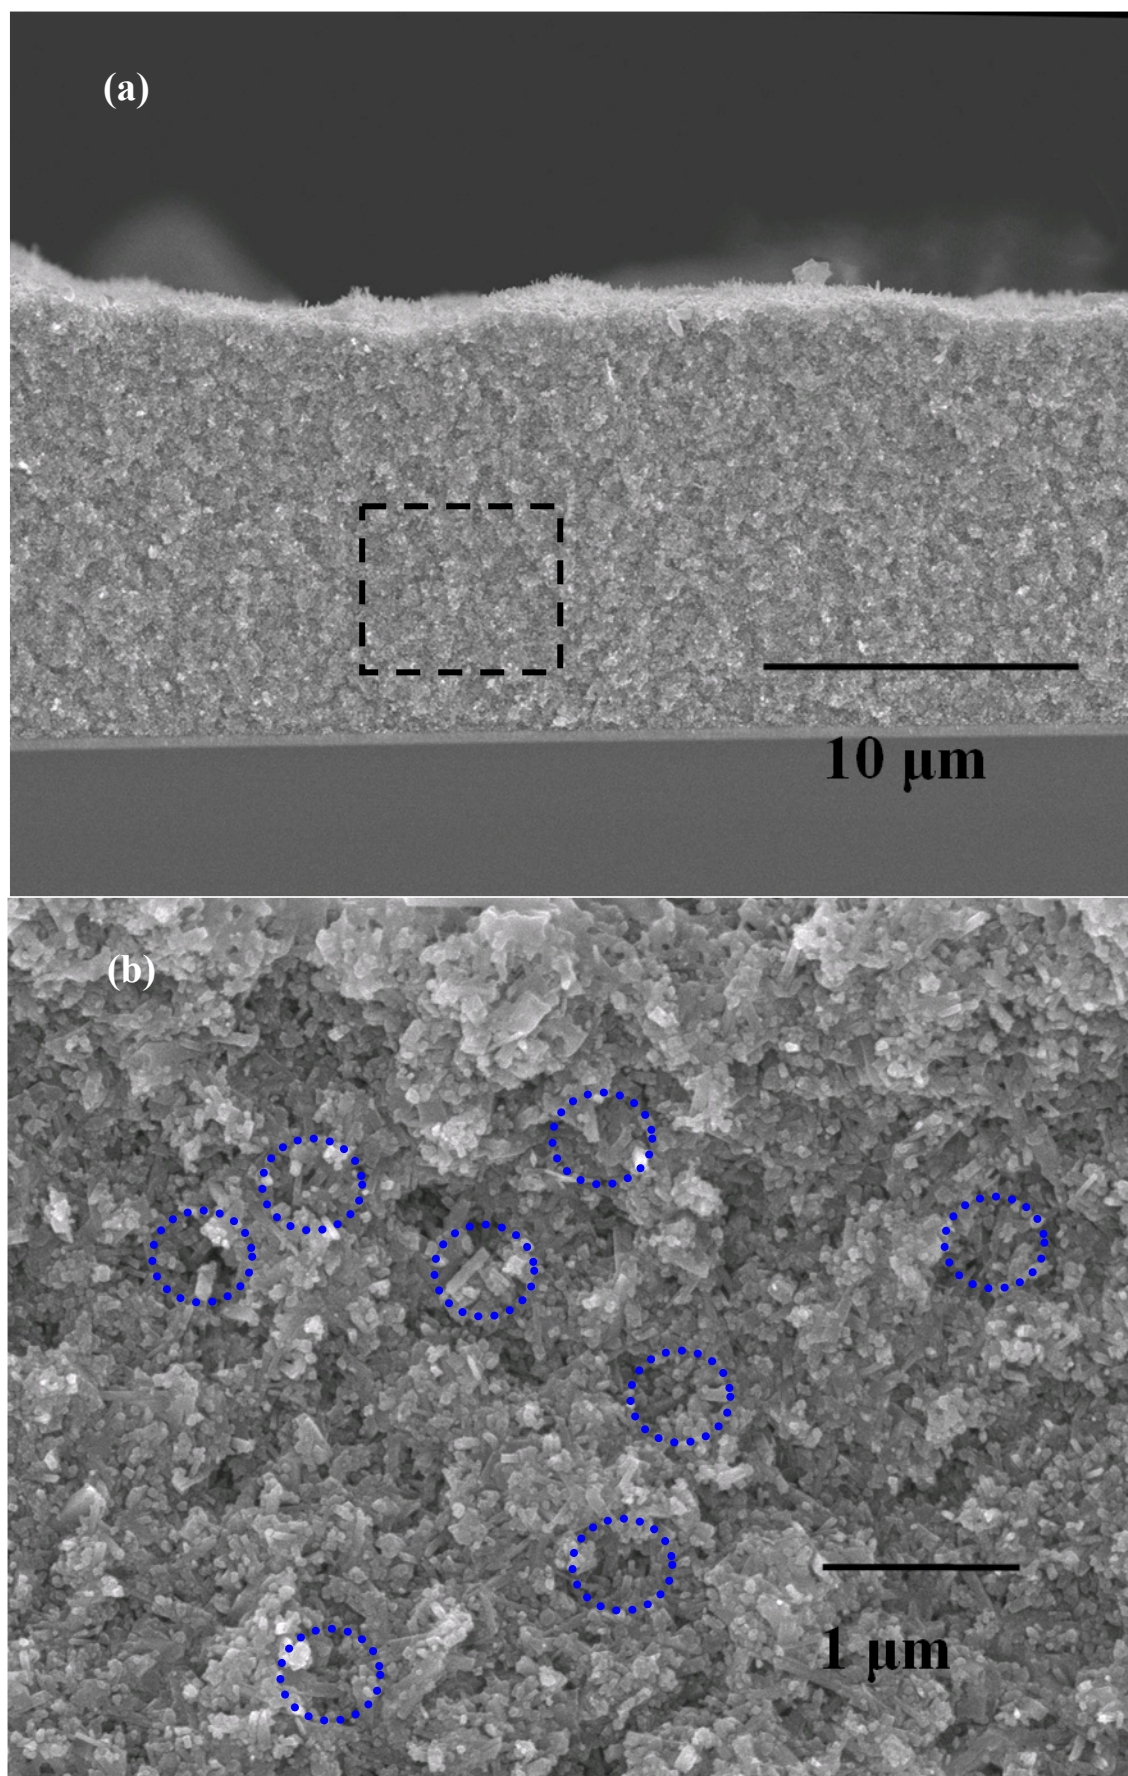

Fig. S1 (a) SEM image of cross-sectional of the 2T-P25 film. (b) Enlarged SEM image

corresponding to the region marked with black rectangular.
